# Supplementary material for: Mirror-image magnetic circularly polarized luminescence (MCPL) from optically inactive EuIII and TbIIItris(β-diketonate)
Source: Royal Society of Chemistry journal article supplement (doi:10.1039/d0dt01464h), 2020-01-01
Supplement: d0dt01464h1.pdf [file d0dt01464h1.pdf]

Electronic Supporting Information (ESI) for Dalton Transactions.  
This journal is © The Royal Society of Chemistry 2020

**Mirror-image magnetic circularly polarized luminescence (MCPL) from optically inactive Eu<sup>III</sup> and Tb<sup>III</sup> tris( $\beta$ -diketonate)**

Hiroki Yoshikawa,<sup>a</sup> Gaku Nakajima,<sup>a</sup> Yuki Mimura,<sup>a</sup> Takahiro Kimoto,<sup>a</sup> Yoshiro Kondo,<sup>b</sup>  
Satoko Suzuki,<sup>b</sup> Michiya Fujiki<sup>c\*</sup> and Yoshitane Imai<sup>a\*</sup>

*a Department of Applied Chemistry, Faculty of Science and Engineering, Kindai University,  
3-4-1 Kowakae, Higashi-Osaka, Osaka 577-8502, Japan.*

*b JASCO Corporation, 2967-5 Ishikawa-machi Hachioji-shi Tokyo Japan 192-8537, Japan.*

*c Graduate School of Materials Science, Nara Institute of Science and Technology, 8916-5  
Takayama, Ikoma, Nara 630-0192, Japan.*

\*Corresponding author. Tel.: (YI) +81 06 6730 5880x5241; fax: (YI) +81 06 6727 2024;  
e-mail: (YI) y-imai@apch.kindai.ac.jp, (MF) fujikim@ms.naist.jp.

## Table of Contents

|                                                                                                                                                |     |
|------------------------------------------------------------------------------------------------------------------------------------------------|-----|
| 1. CPL and PL spectra of $\text{Eu}^{\text{III}}(\text{hfa})_3$ .....                                                                          | S3  |
| 2. CD and UV-Vis spectra of $\text{Eu}^{\text{III}}(\text{hfa})_3$ .....                                                                       | S3  |
| 3. CPL and PL spectra of $\text{Tb}^{\text{III}}(\text{hfa})_3$ .....                                                                          | S4  |
| 4. CD and UV-Vis spectra of $\text{Tb}^{\text{III}}(\text{hfa})_3$ .....                                                                       | S4  |
| 5. MCPL properties of $\text{Eu}^{\text{III}}(\text{hfa})_3$ in PMMA film, KBr pellet and powder states under 1.6 T. ..                        | S5  |
| 6. MCPL properties of $\text{Tb}^{\text{III}}(\text{hfa})_3$ in PMMA film, KBr pellet and powder states under 1.6 T. ..                        | S6  |
| 7. MCPL properties of $\text{Tb}^{\text{III}}(\text{acac})_3 \cdot \text{Phen}$ in $\text{CHCl}_3$ ( $1.0 \times 10^{-3}$ M) under 1.6 T. .... | S6  |
| 8. Comparison of normalized PL spectra of $\text{Eu}^{\text{III}}(\text{hfa})_3$ in $\text{CHCl}_3$ solution. ....                             | S7  |
| 9. Comparison of normalized PL spectra of $\text{Eu}^{\text{III}}(\text{hfa})_3$ in acetone solution. ....                                     | S8  |
| 10. Comparison of normalized PL spectra of $\text{Eu}^{\text{III}}(\text{acac})_3 \cdot \text{Phen}$ in $\text{CHCl}_3$ solution. ....         | S9  |
| 11. Comparison of normalized PL spectra of $\text{Tb}^{\text{III}}(\text{hfa})_3$ in $\text{CHCl}_3$ solution. ....                            | S10 |
| 12. Comparison of normalized PL spectra of $\text{Tb}^{\text{III}}(\text{hfa})_3$ in acetone solution. ....                                    | S12 |
| 13. Comparison of normalized PL spectra of $\text{Tb}^{\text{III}}(\text{acac})_3 \cdot \text{Phen}$ in $\text{CHCl}_3$ solution. ....         | S13 |

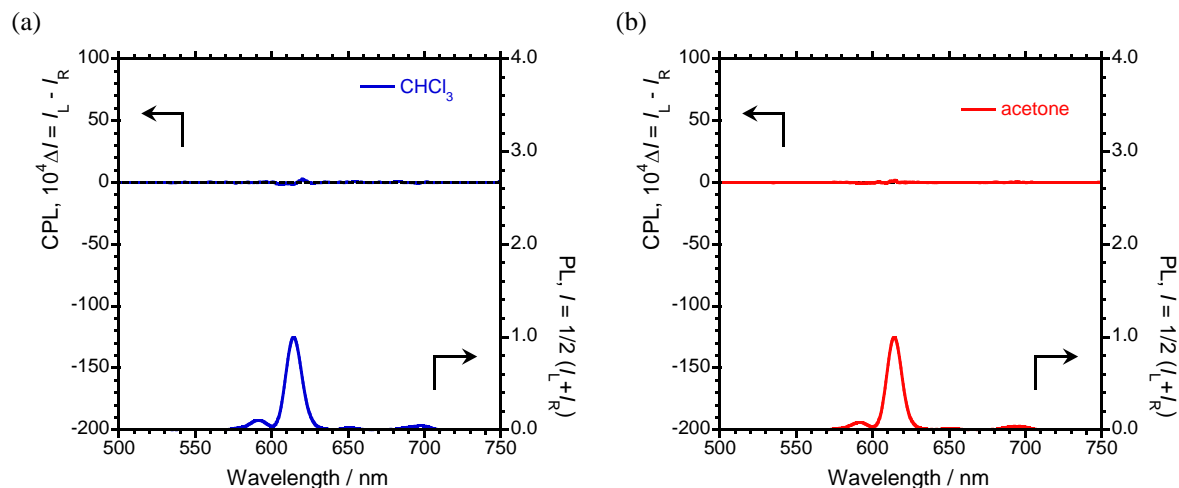

**Fig. S1.** Comparison of CPL (upper panel) and PL (lower panel) spectra of  $\text{Eu}^{\text{III}}(\text{hfa})_3$  in (a)  $\text{CHCl}_3$  and (b) acetone for  $1.0 \times 10^{-3}$  M, ( $\text{CHCl}_3$  :  $\lambda_{\text{ex}} = 300$  nm. and acetone :  $\lambda_{\text{ex}} = 330$  nm. Path length = 5 mm.

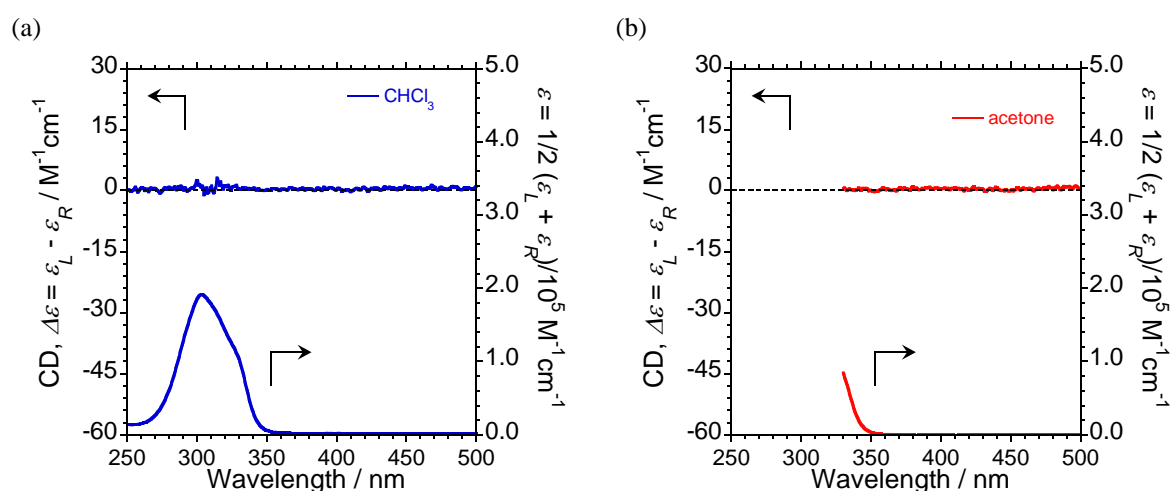

**Fig. S2.** Comparison of CD (upper panel) and UV (lower panel) spectra of  $\text{Eu}^{\text{III}}(\text{hfa})_3$  in (a)  $\text{CHCl}_3$  and (b) acetone for  $1.0 \times 10^{-3}$  M, ( $\text{CHCl}_3$  :  $\lambda_{\text{ex}} = 300$  nm. and acetone :  $\lambda_{\text{ex}} = 330$  nm. Path length = 1 mm.

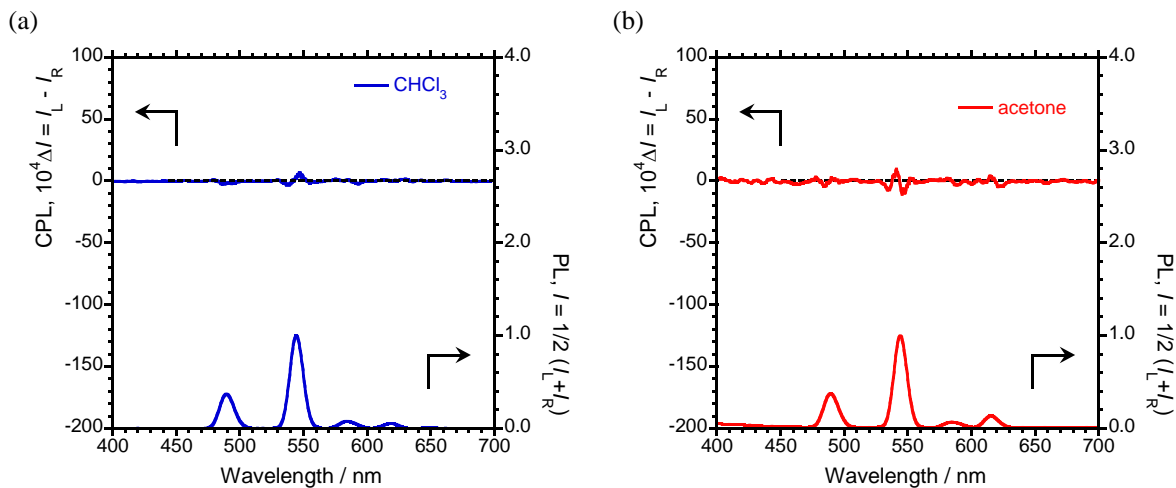

**Fig. S3.** Comparison of CPL (upper panel) and PL (lower panel) spectra of  $\text{Tb}^{\text{III}}(\text{hfa})_3$  in (a)  $\text{CHCl}_3$  and (b) acetone for  $1.0 \times 10^{-3}$  M, ( $\text{CHCl}_3$  :  $\lambda_{\text{ex}} = 300$  nm. and acetone :  $\lambda_{\text{ex}} = 330$  nm. Path length = 5 mm.

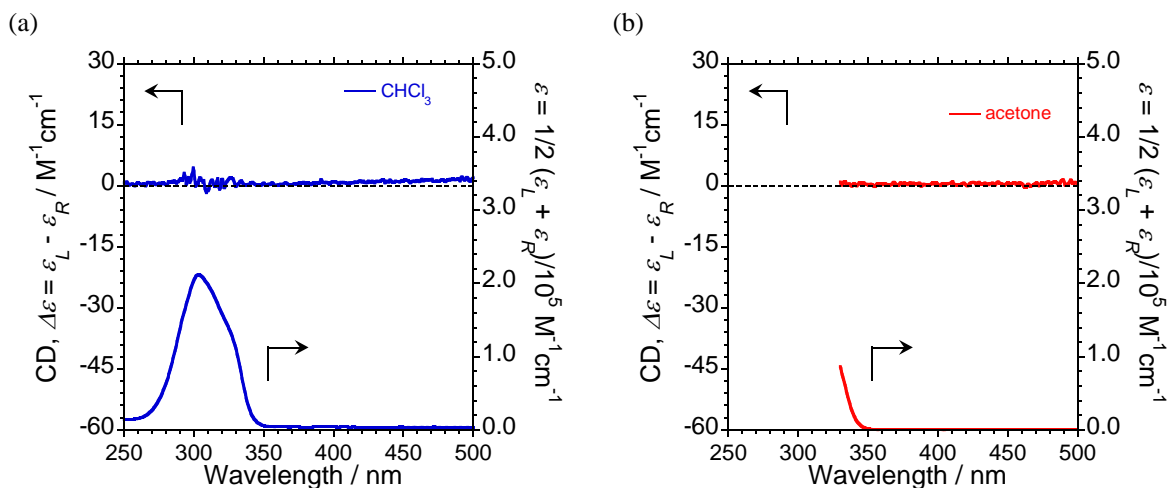

**Fig. S4.** Comparison of CD (upper panel) and UV (lower panel) spectra of  $\text{Tb}^{\text{III}}(\text{hfa})_3$  in (a)  $\text{CHCl}_3$  and (b) acetone for  $1.0 \times 10^{-3}$  M, ( $\text{CHCl}_3$  :  $\lambda_{\text{ex}} = 300$  nm. and acetone :  $\lambda_{\text{ex}} = 330$  nm. Path length = 1 mm.

**Table S1.** MCPL properties of  $\text{Eu}^{\text{III}}(\text{hfa})_3$  in PMMA film, KBr pellet and powder states under 1.6 T.

| Entry | State      | $\lambda_{\text{MCPL}}$<br>(nm) | $ g_{\text{MCPL}} $<br>( $10^{-2}\text{T}^{-1}$ ) |
|-------|------------|---------------------------------|---------------------------------------------------|---------------------------------|---------------------------------------------------|---------------------------------|---------------------------------------------------|---------------------------------|---------------------------------------------------|
| 1     | PMMA-film  | 587                             | 0.75                                              | 598                             | 0.81                                              | 610                             | 0.63                                              | 620                             | 0.58                                              |
|       |            | 689                             | 1.7                                               | 703                             | 1.5                                               |                                 |                                                   |                                 |                                                   |
| 2     | KBr-pellet | 587                             | 0.69                                              | 596                             | 0.63                                              | 609                             | 0.58                                              | 619                             | 0.51                                              |
|       |            | 689                             | 1.4                                               | 704                             | 1.2                                               |                                 |                                                   |                                 |                                                   |
| 3     | Powder     | 587                             | 0.18                                              | 596                             | 0.11                                              | 609                             | 0.094                                             | 620                             | 0.046                                             |
|       |            | 688                             | 0.22                                              | 705                             | 0.22                                              |                                 |                                                   |                                 |                                                   |

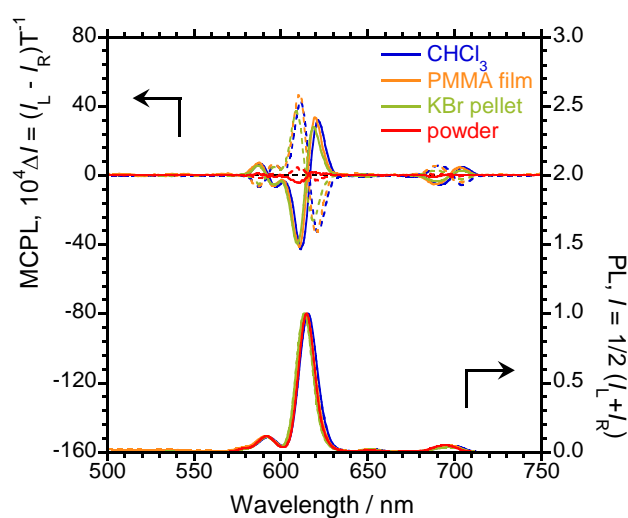**Fig. S5.** MCPL (upper panel) and PL (lower panel) spectra of  $\text{Eu}^{\text{III}}(\text{hfa})_3$  in N-up (solid lines) and S-up (dotted lines) configurations under 1.6 T in  $\text{CHCl}_3$  ( $1.0 \times 10^{-3}$  m) in PMMA film (orange lines), KBr pellet (green lines) and powder (red lines) states.

**Table S2.** MCPL properties of  $\text{Tb}^{\text{III}}(\text{hfa})_3$  in PMMA film, KBr pellet and powder states under 1.6 T.

| Entry | State      | $\lambda_{\text{MCPL}}$<br>(nm) | $ g_{\text{MCPL}} $<br>( $10^{-2}\text{T}^{-1}$ ) |
|-------|------------|---------------------------------|---------------------------------------------------|---------------------------------|---------------------------------------------------|---------------------------------|---------------------------------------------------|---------------------------------|---------------------------------------------------|
| 1     | PMMA-film  | 483                             | 0.39                                              | 495                             | 0.54                                              | 540                             | 0.061                                             | 555                             | 0.26                                              |
|       |            | 579                             | 0.41                                              | 589                             | 0.88                                              | 616                             | 0.47                                              | 626                             | 0.88                                              |
| 2     | KBr-pellet | 483                             | 0.28                                              | 493                             | 0.21                                              | 539                             | 0.068                                             | 553                             | 0.068                                             |
|       |            | 578                             | 0.43                                              | 588                             | 0.58                                              | 616                             | 0.075                                             | 626                             | 0.59                                              |
| 3     | Powder     | 482                             | 0.14                                              | 494                             | 0.081                                             | 539                             | 0.0081                                            | 553                             | 0.036                                             |
|       |            | 577                             | 0.20                                              | 589                             | 0.20                                              | 615                             | 0.075                                             | 626                             | 0.19                                              |

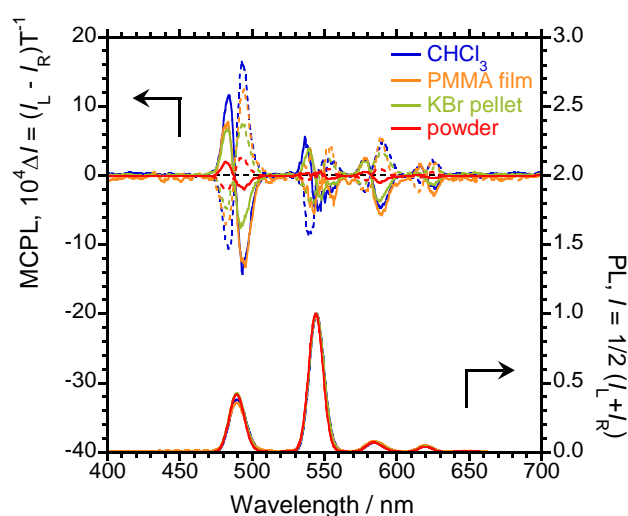**Fig. S6.** MCPL (upper panel) and PL (lower panel) spectra of  $\text{Tb}^{\text{III}}(\text{hfa})_3$  in N-up (solid lines) and S-up (dotted lines) configurations under 1.6 T in  $\text{CHCl}_3$  ( $1.0 \times 10^{-3}$  M) in PMMA film (orange lines), KBr pellet (green lines) and powder (red lines) state.**Table S3.** MCPL properties of  $\text{Tb}^{\text{III}}(\text{acac})_3 \cdot \text{Phen}$  in  $\text{CHCl}_3$  ( $1.0 \times 10^{-3}$  M) under 1.6 T.

| Entry | State           | $\lambda_{\text{MCPL}}$<br>(nm) | $ g_{\text{MCPL}} $<br>( $10^{-2}\text{T}^{-1}$ ) |
|-------|-----------------|---------------------------------|---------------------------------------------------|---------------------------------|---------------------------------------------------|---------------------------------|---------------------------------------------------|---------------------------------|---------------------------------------------------|
| 1     | $\text{CHCl}_3$ | 482                             | 0.69                                              | 494                             | 0.49                                              | 539                             | 0.23                                              | 549                             | 0.094                                             |
|       |                 | 578                             | 0.75                                              | 592                             | 1.1                                               | 613                             | 0.36                                              | 627                             | 0.81                                              |

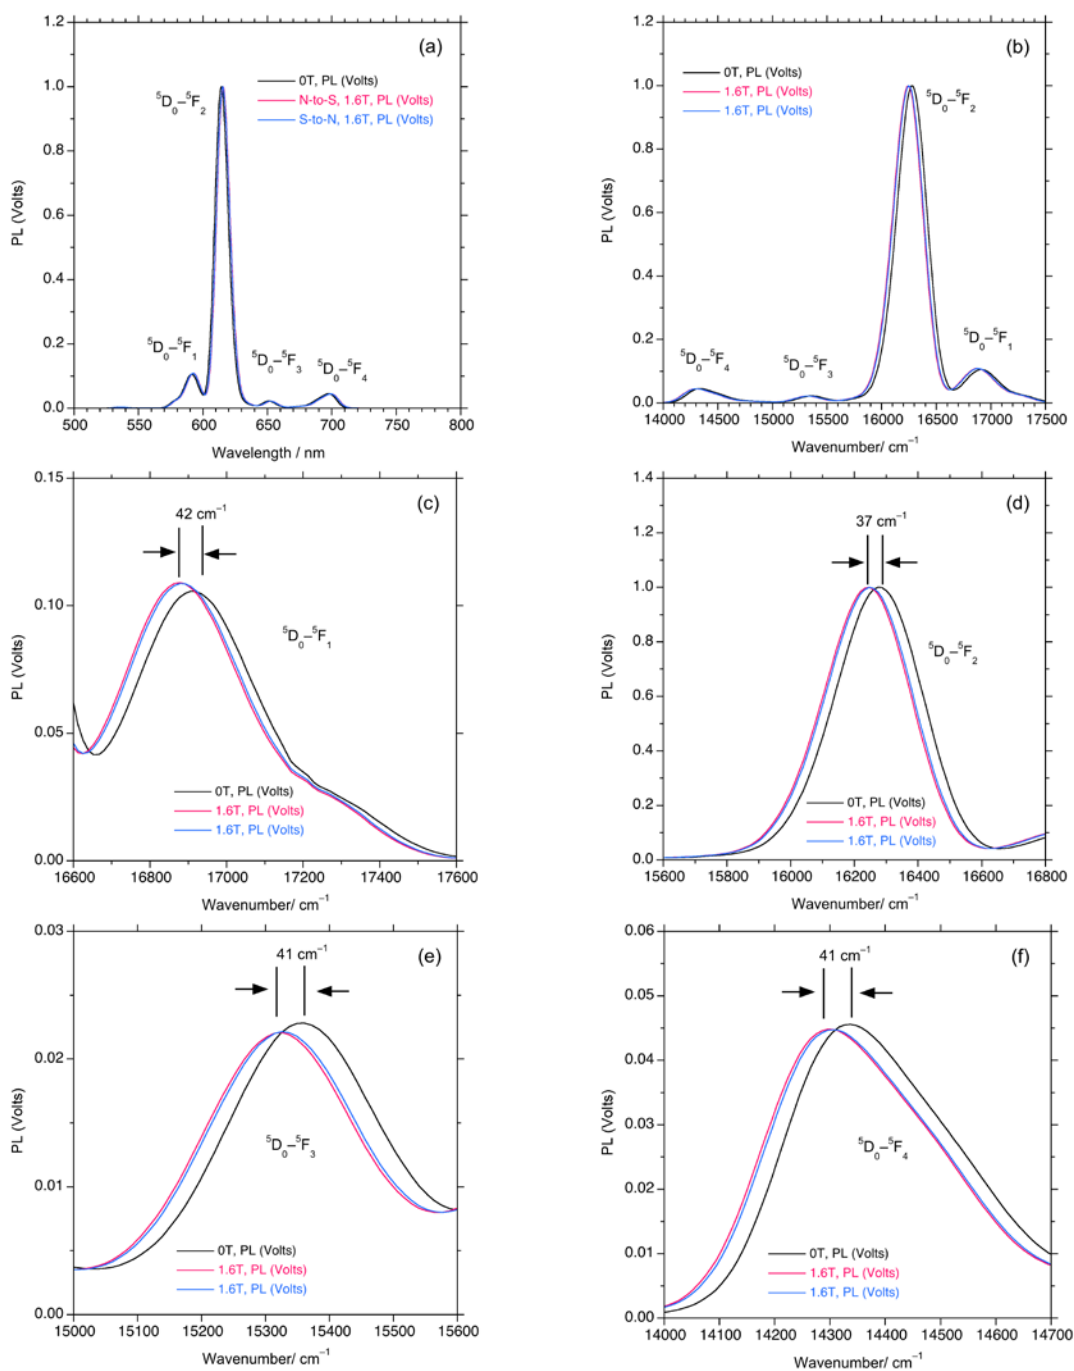

**Fig. S7.** Comparison of normalized PL spectra of  $\text{Eu}^{\text{III}}(\text{hfa})_3$  in  $\text{CHCl}_3$  solution.  $1.0 \times 10^{-3}$  M:  $\lambda_{\text{ex}} = 300$  nm. Pathlength = 5 mm in the absence of 1.6 T (black line) and in the presence of 1.6 T with N-up (red line) and with S-up (blue line) configurations as functions of (a) wavelength in nm and (b–f) of wavenumber in  $\text{cm}^{-1}$ .

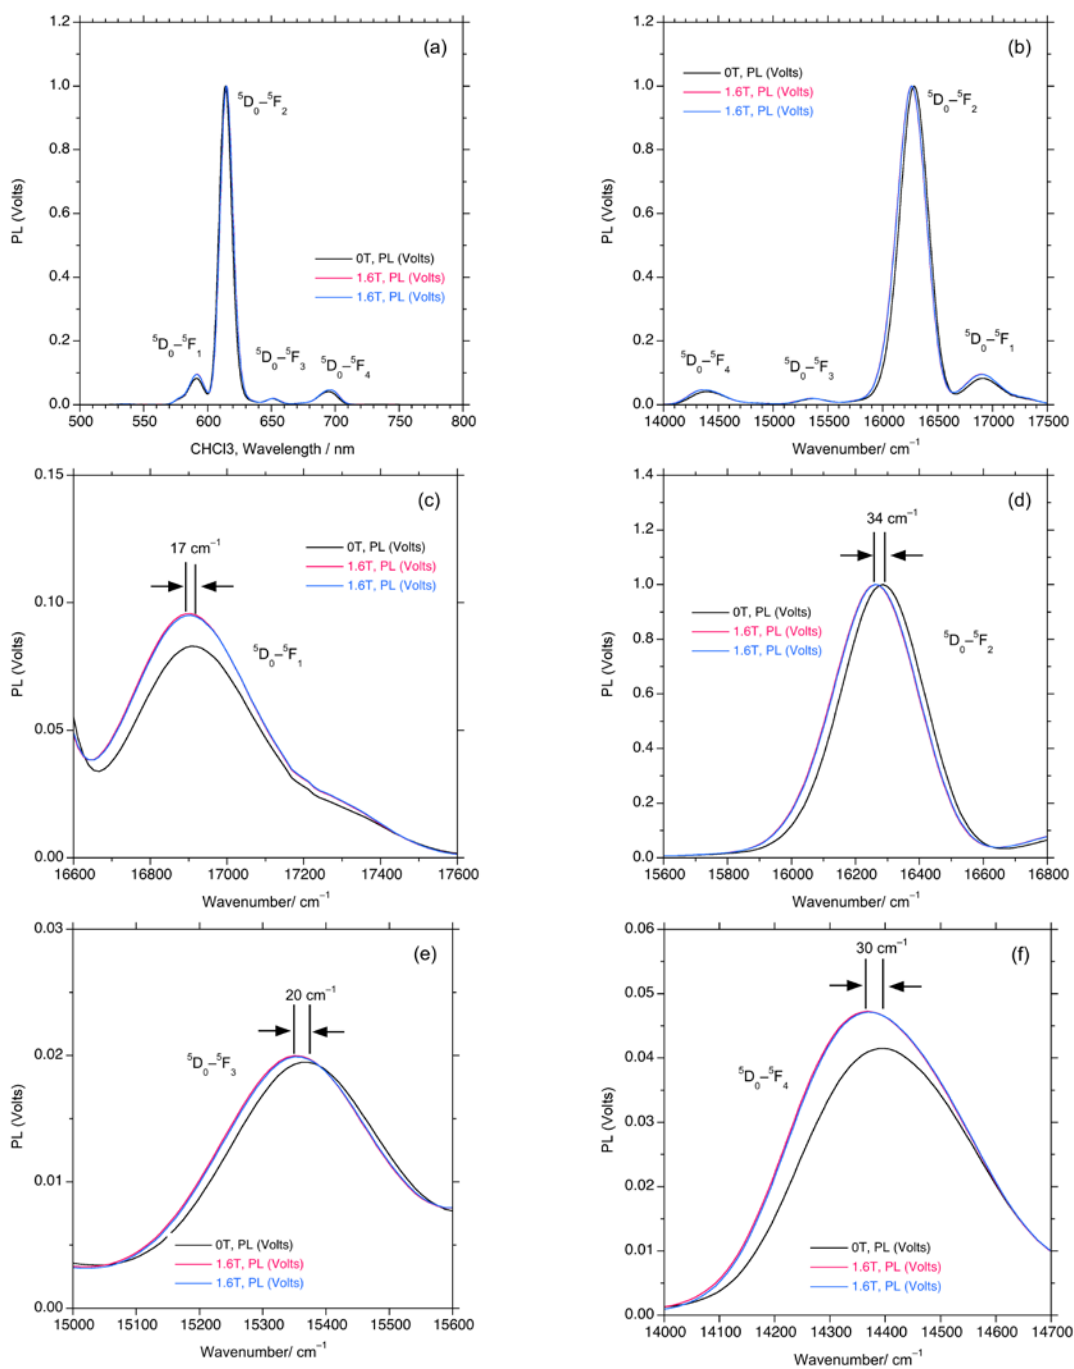

**Fig. S8.** Comparison of normalized PL spectra of  $\text{Eu}^{\text{III}}(\text{hfa})_3$  in acetone solution.  $1.0 \times 10^{-3} \text{ M}$ :  $\lambda_{\text{ex}} = 330 \text{ nm}$ . Pathlength = 5 mm in the absence of 1.6 T (black line) and in the presence of 1.6 T with N-up (red line) and with S-up (blue line) configurations as functions of (a) wavelength in nm and (b–f) of wavenumber in  $\text{cm}^{-1}$ .



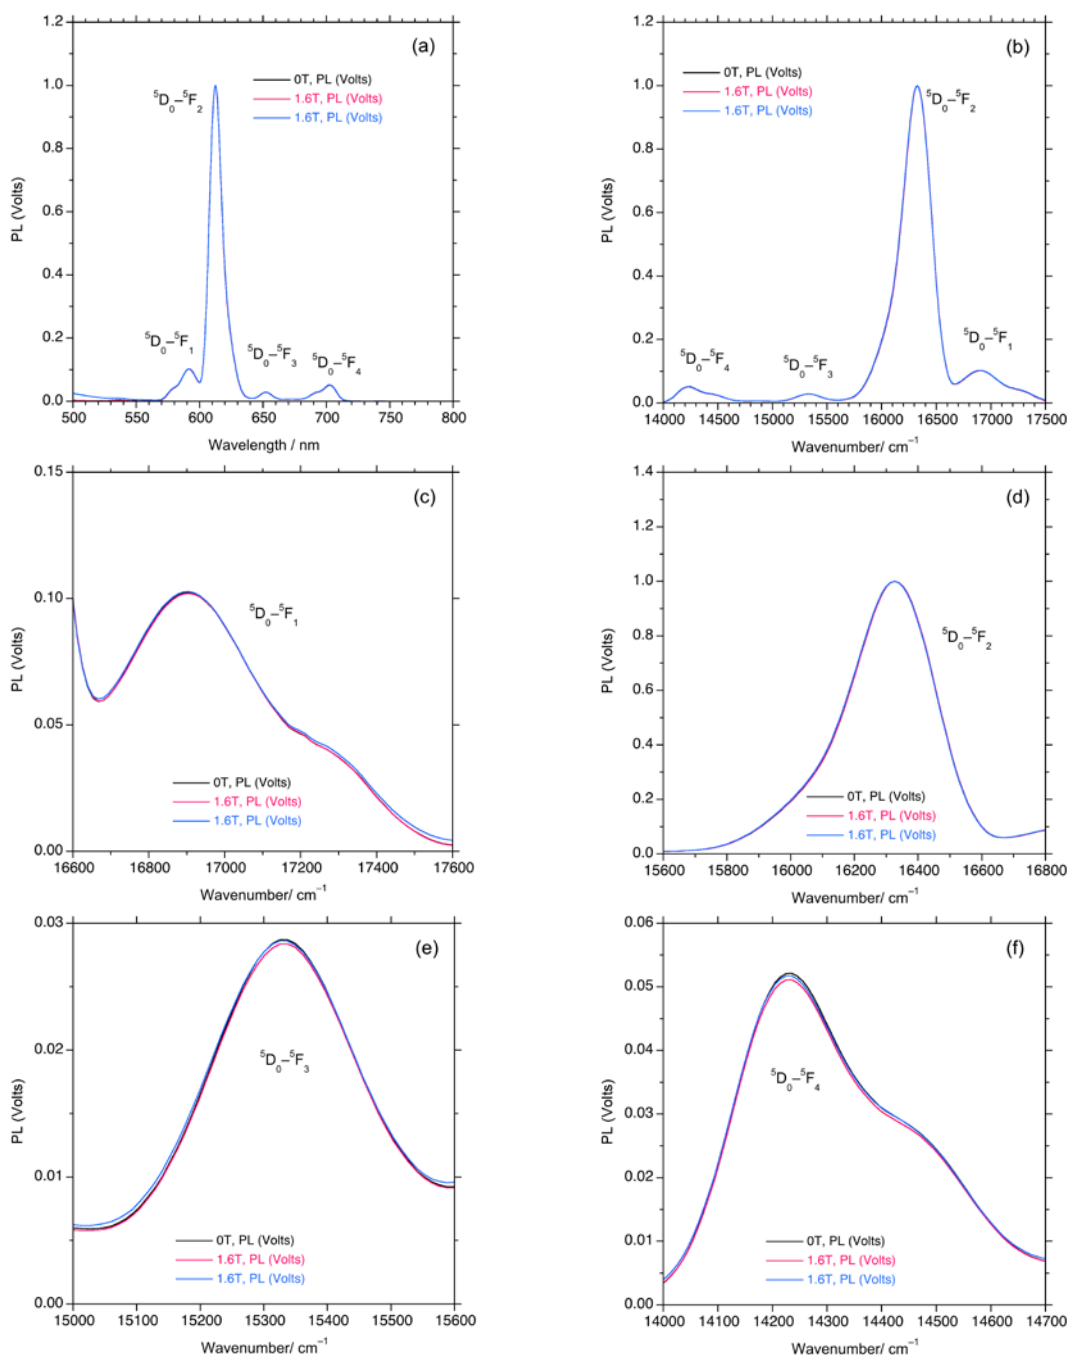

**Fig. S9.** Comparison of normalized PL spectra of  $\text{Eu}^{\text{III}}(\text{acac})_3 \cdot \text{Phen}$  in  $\text{CHCl}_3$  solution.  $1.0 \times 10^{-3} \text{ M}$ ;  $\lambda_{\text{ex}} = 300 \text{ nm}$ . Pathlength = 5 mm in the absence of 1.6 T (black line) and in the presence of 1.6 T with N-up (red line) and with S-up (blue line) configurations as functions of (a) wavelength in nm and (b–f) of wavenumber in  $\text{cm}^{-1}$ .

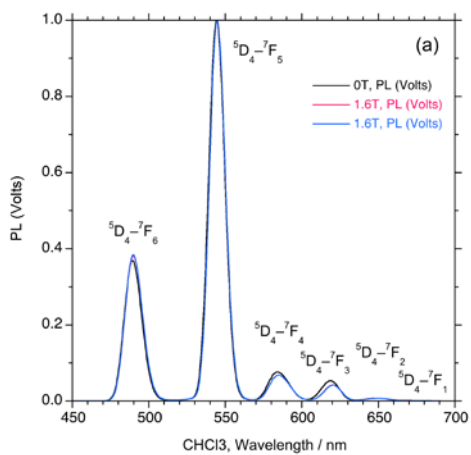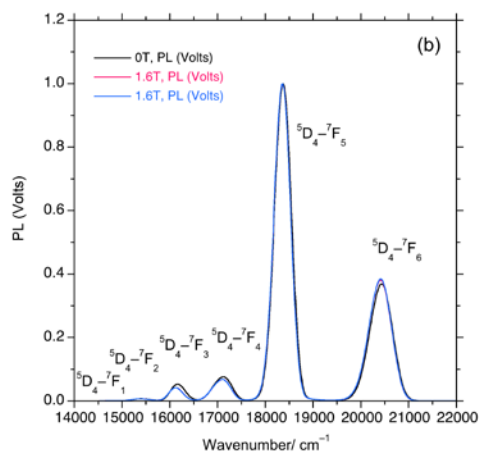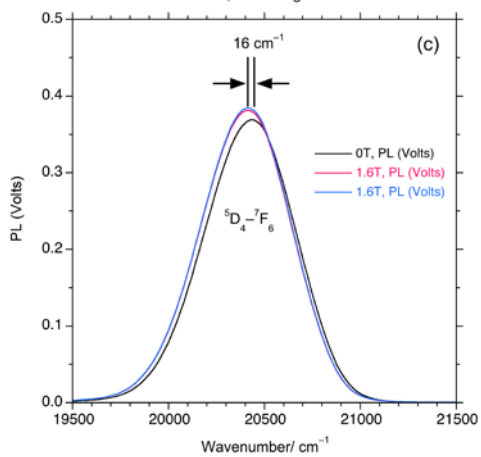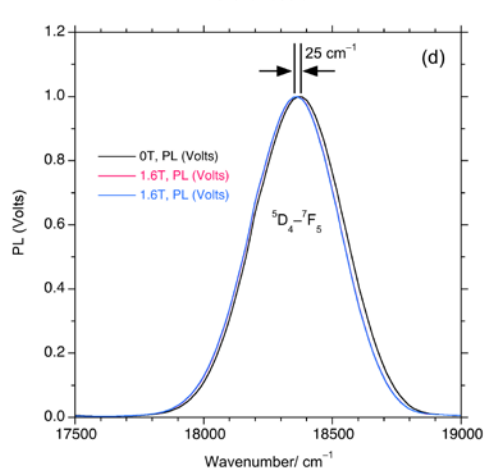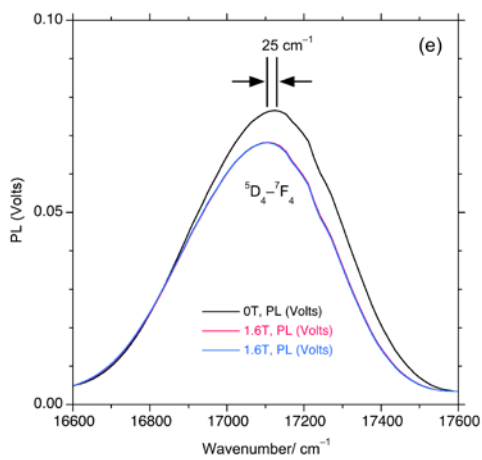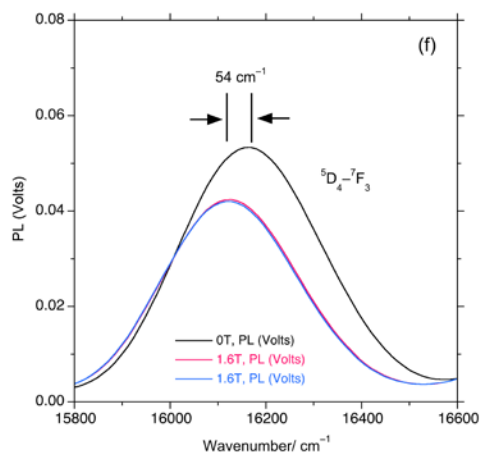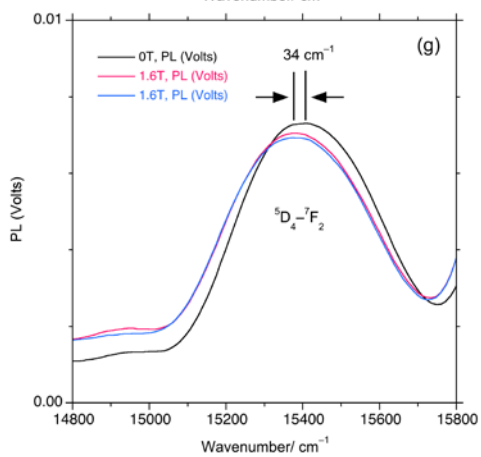

**Fig. S10.** Comparison of normalized PL spectra of  $\text{Tb}^{\text{III}}(\text{hfa})_3$  in  $\text{CHCl}_3$  solution.  $1.0 \times 10^{-3} \text{ M}$ :  $\lambda_{\text{ex}} = 300 \text{ nm}$ . Pathlength = 5 mm in the absence of 1.6 T (black line) and in the presence of 1.6 T with N-up (red line) and with S-up (blue line) configurations as functions of (a) wavelength in nm and (b–g) of wavenumber in  $\text{cm}^{-1}$ .

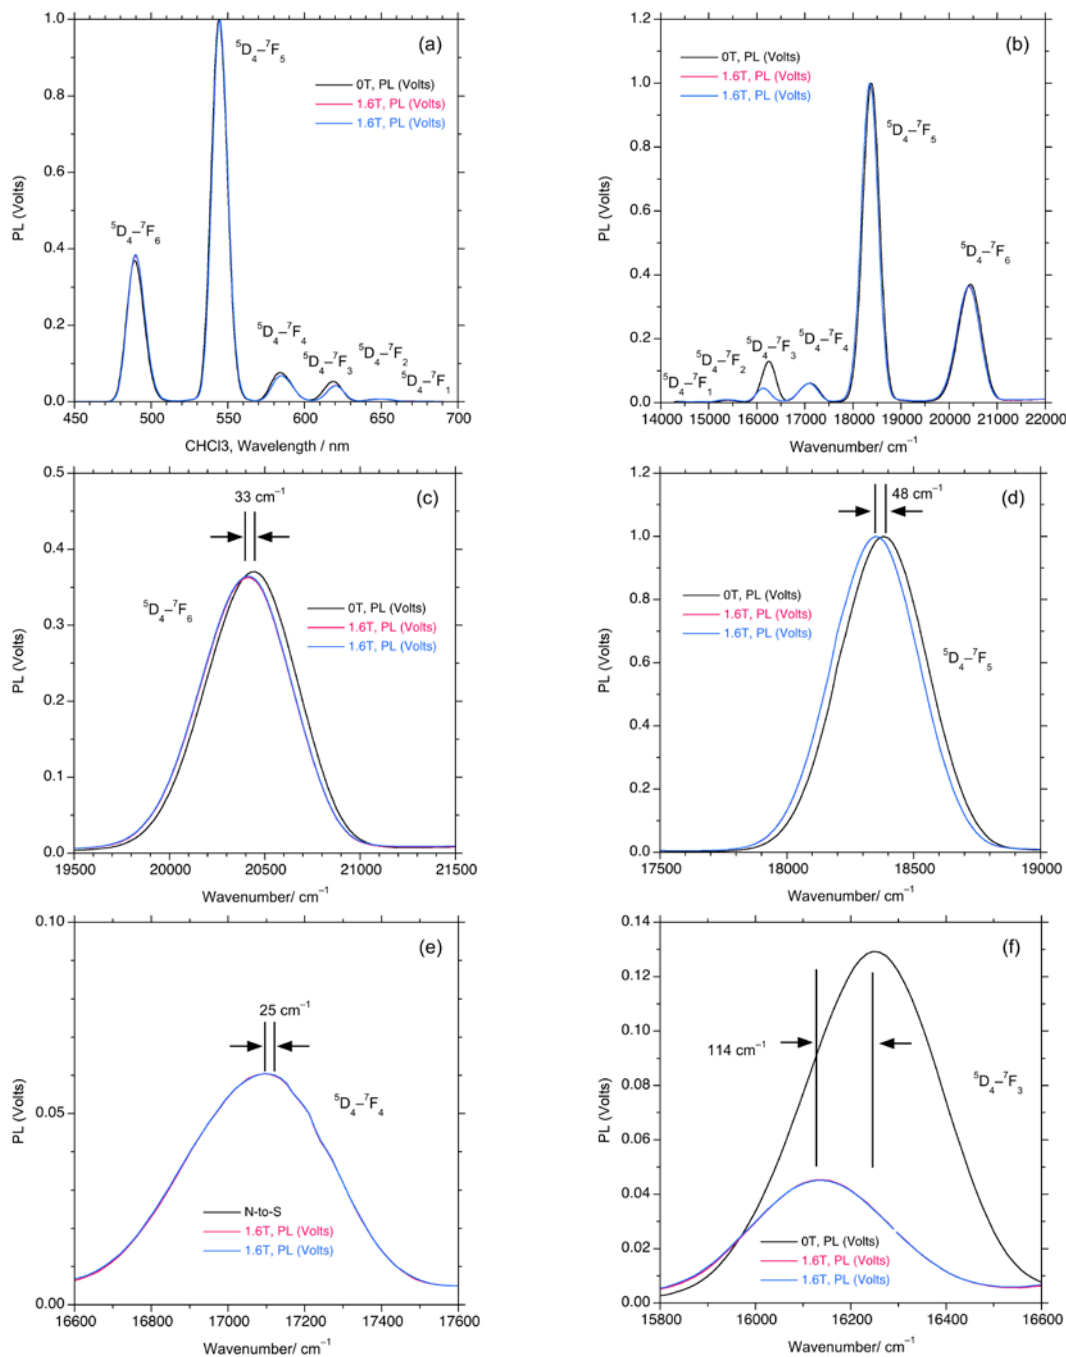

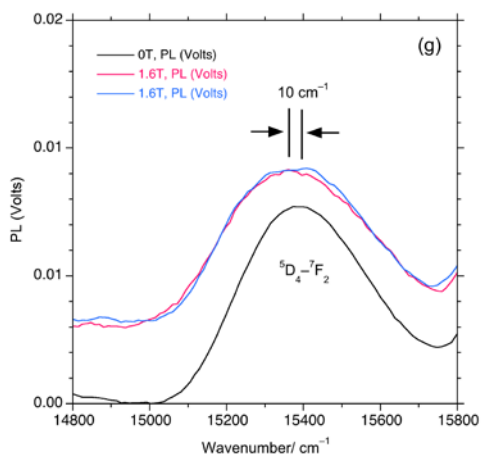

**Fig. S11.** Comparison of normalized PL spectra of  $\text{Tb}^{\text{III}}(\text{hfa})_3$  in acetone solution.  $1.0 \times 10^{-3} \text{ M}$ :  $\lambda_{\text{ex}} = 330 \text{ nm}$ . Pathlength = 5 mm in the absence of 1.6 T (black line) and in the presence of 1.6 T with N-up (red line) and with S-up (blue line) configurations as functions of (a) wavelength in nm and (b–g) of wavenumber in  $\text{cm}^{-1}$ .

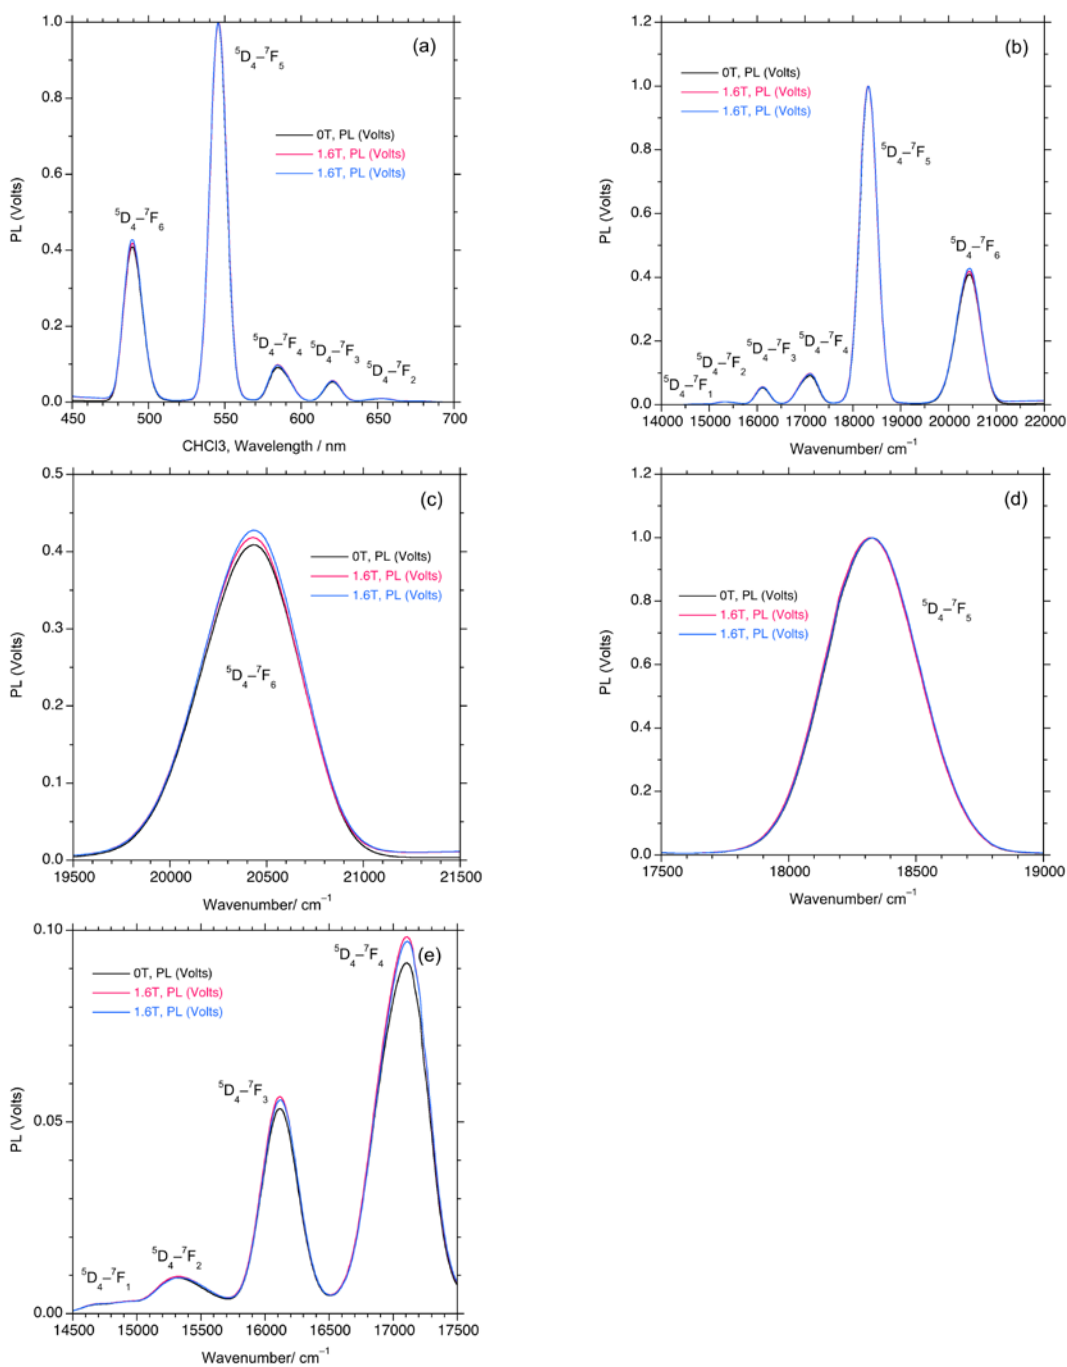

**Fig. S12.** Comparison of normalized PL spectra of  $\text{Tb}^{\text{III}}(\text{acac})_3 \cdot \text{Phen}$  in  $\text{CHCl}_3$  solution.  $1.0 \times 10^{-3} \text{ M}$ ;  $\lambda_{\text{ex}} = 300 \text{ nm}$ . Pathlength = 5 mm in the absence of 1.6 T (black line) and in the presence of 1.6 T with N-up (red line) and with S-up (blue line) configurations as functions of (a) wavelength in nm and (b–e) of wavenumber in  $\text{cm}^{-1}$ .
